# Supplementary material
Source: PubMed Central journal article supplement (PMC3147114)
Supplement: NIHMS303170-supplement-1.pdf [file NIHMS303170-supplement-1.pdf]

## **SUPPLEMENTAL MATERIAL**

### **Supplemental Methods**

#### **Handling collinearity, model selection, and using cross-validation**

To avoid collinearity problems arising from adding the highly correlated cytokine levels into the model, we transform the cytokine data using the method of independent components analysis [1] (ICA) and calculate the latent, independent factors. We ensure that the variables used in building the logistic regression model will be statistically independent of one another, and the coefficients can be interpreted as logarithms of odds ratios. ICA is a computational method for refactoring multivariate data into additive subcomponents that are mutually statistically independent. The factors calculated by ICA are linear combinations of the original measurements, and can be interpreted as hidden (independent) factors that underlie the correlated original measurements. Unlike principal components analysis, which assumes data is distributed normally, ICA makes no distributional assumptions, and is therefore more effective than PCA for our problem. We then use L2-penalized logistic regression with stepwise variable selection [2] to construct the final model. The predictive power of the model is measured using the C-statistic, or the area under the receiver operating characteristic curve. Since we do not have an independent hold-out set, we estimate out-of-sample performance of a model using  $k$ -fold cross validation [3,4]. Cross-validation is a robust and widely used technique in statistics for estimating performance of predictive models in contexts where there is no readily available source of independent data for testing models. Its theoretical robustness properties are detailed in Picard and Cook [3]. In  $k$ -fold cross-validation, the original sample is randomly partitioned into  $k$  equal-sized, non-overlapping subsamples. Of the  $k$  subsamples, a single subsample is retained for testing the model, and the remaining  $k-1$  subsamples are used as training data.  $k$  models are trained, with each of the  $k$  subsamples used exactly once for validation. Results from the  $k$  models are

averaged to estimate mean and standard deviation of the model performance measure. Usual choices for  $k$  range from five to ten, and we use ten-fold cross-validation for all of our analysis. Ten-fold cross-validation was also used to estimate model performance in ADHERE.

### **Learning ensemble models from data: the AdaBoost algorithm**

We use a variation of the classic AdaBoost algorithm [5], called gentle boosting [6], to learn an ensemble model. Boosting associates weights with each training example, which signify its importance in classification. Initially, all the training data are weighted equally, and AdaBoost learns a classifier  $G_1$  for the initial data. For each successive round, the training data are re-weighted. If a data point is incorrectly classified, then it receives more weight in the next round. Correctly classified data points receive less weight in the next round. Thus as rounds proceed, training data points that are difficult to correctly classify receive ever-increasing importance. Each successive classifier is forced to concentrate on those training data that are missed by the previous classifiers in the sequence. Thus, AdaBoost constructs a sequence of simple weighted classifiers, each forced to learn a different aspect of the data, to generate an ensemble classifier.

In our model, we use decision stumps (one-level decision trees) for classification. Gentle boosting produces a weighted sequence of  $K$  decision stumps. The final decision produced on each new case is the weighted majority vote among these  $K$  decision stump classifiers. As with any method, ensembles have advantages and disadvantages. They can achieve near perfect classification accuracy even on tough problems. However, they are difficult to explain because one typically needs 50 to 100 members in the ensemble to achieve good accuracies. Each model can be represented by a single equation; however the complete model consists of 50 to 100 equations, based on the size of the ensemble. Overfitting can be a serious problem, and so we use

a regularization parameter to control it [6], so that out of sample prediction with these classifiers is as good as on the training sample.

## Supplemental Tables

### Definitions of the latent factors in the ICA analysis

The factors in Table 4 in the main body of the paper are defined as follows.

$$\begin{aligned} X2 = & 0.013 \log \text{TNF} - 0.009 \log \text{sTNFR1} - 0.014 \log \text{sTNFR2} - 0.061 \log \text{IL6} + 0.007 \log \text{sIL6R} \\ & - 0.025 \text{wk08} \log \text{TNF} - 0.086 \text{wk08} \log \text{sTNFR1} - 0.109 \text{wk08} \log \text{sTNFR2} - 0.089 \text{wk08} \log \\ & \text{IL6} - 0.029 \text{wk08} \log \text{sIL6R} + 0.443 \text{wk16} \log \text{TNF} + \mathbf{2.006 \text{wk16} \log \text{sTNFR1}} + \mathbf{2.212 \text{wk16} \log \text{sTNFR2}} \\ & + 0.354 \text{wk16} \log \text{IL6} + 0.96 \text{wk16} \log \text{sIL6R} + 0.491 \text{wk24} \log \text{TNF} + \mathbf{2.198} \\ & \mathbf{\text{wk24} \log \text{sTNFR1}} + \mathbf{2.411 \text{wk24} \log \text{sTNFR2}} + 0.447 \text{wk24} \log \text{IL6} + 1.037 \text{wk24} \log \text{sIL6R} \end{aligned}$$

$$\begin{aligned} X3 = & 0.022 \log \text{TNF} + 0.055 \log \text{sTNFR1} + 0.048 \log \text{sTNFR2} + 0.029 \log \text{IL6} + 0.018 \log \\ & \text{sIL6R} + 0.478 \text{wk08} \log \text{TNF} + \mathbf{2.131 \text{wk08} \log \text{sTNFR1}} + \mathbf{2.337 \text{wk08} \log \text{sTNFR2}} + 0.409 \\ & \text{wk08} \log \text{IL6} + 1.106 \text{wk08} \log \text{sIL6R} + 0.013 \text{wk16} \log \text{TNF} + 0.099 \text{wk16} \log \text{sTNFR1} + 0.086 \\ & \text{wk16} \log \text{sTNFR2} - 0.209 \text{wk16} \log \text{IL6} + 0.037 \text{wk16} \log \text{sIL6R} + 0.023 \text{wk24} \log \text{TNF} + \\ & 0.017 \text{wk24} \log \text{sTNFR1} - 0.028 \text{wk24} \log \text{sTNFR2} + 0.004 \text{wk24} \log \text{IL6} - 0.009 \text{wk24} \log \\ & \text{sIL6R} \end{aligned}$$

$$\begin{aligned} X5 = & -0.059 \log \text{TNF} - 0.135 \log \text{sTNFR1} - 0.098 \log \text{sTNFR2} - \mathbf{0.595 \log \text{IL6}} - 0.008 \log \text{sIL6R} \\ & - 0.073 \text{wk08} \log \text{TNF} - 0.149 \text{wk08} \log \text{sTNFR1} - 0.138 \text{wk08} \log \text{sTNFR2} - \mathbf{0.598 \text{wk08} \log} \\ & \mathbf{\text{IL6}} - 0.011 \text{wk08} \log \text{sIL6R} - 0.092 \text{wk16} \log \text{TNF} - 0.161 \text{wk16} \log \text{sTNFR1} - \mathbf{0.603 \text{wk16} \log \text{sTNFR2}} \\ & - 0.039 \text{wk16} \log \text{IL6} - 0.084 \text{wk16} \log \text{sIL6R} - 0.084 \text{wk24} \log \text{TNF} - 0.201 \text{wk24} \\ & \log \text{sTNFR1} - 0.084 \text{wk24} \log \text{sTNFR2} - \mathbf{0.594 \text{wk24} \log \text{IL6}} - 0.029 \text{wk24} \log \text{sIL6R} \end{aligned}$$

The same information is presented in tabular form below.

The coefficients of the latent factors X2, X3 and X5 in tabular form

|    | <b>log TNF</b> | <b>log sTNFR1</b> | <b>log sTNFR2</b> | <b>log IL6</b> | <b>log sIL6R</b> |
|----|----------------|-------------------|-------------------|----------------|------------------|
| X2 | 0.013          | -0.009            | -0.014            | -0.061         | 0.007            |
| X3 | 0.022          | 0.055             | 0.048             | 0.029          | 0.018            |
| X5 | -0.059         | -0.135            | -0.098            | <b>-0.595</b>  | -0.008           |

|    | <b>wk08<br/>log TNF</b> | <b>wk08<br/>log sTNFR1</b> | <b>wk08<br/>log sTNFR2</b> | <b>wk08<br/>log IL6</b> | <b>wk08<br/>log sIL6R</b> |
|----|-------------------------|----------------------------|----------------------------|-------------------------|---------------------------|
| X2 | -0.025                  | -0.086                     | -0.109                     | -0.089                  | -0.029                    |
| X3 | 0.478                   | <b>2.131</b>               | <b>2.337</b>               | 0.409                   | 1.106                     |
| X5 | -0.073                  | -0.149                     | -0.138                     | <b>-0.598</b>           | -0.011                    |

|    | <b>wk16<br/>log TNF</b> | <b>wk16<br/>log sTNFR1</b> | <b>wk16<br/>log sTNFR2</b> | <b>wk16<br/>log IL6</b> | <b>wk16<br/>log sIL6R</b> |
|----|-------------------------|----------------------------|----------------------------|-------------------------|---------------------------|
| X2 | 0.443                   | <b>2.006</b>               | <b>2.212</b>               | 0.354                   | 0.96                      |
| X3 | 0.013                   | 0.099                      | 0.086                      | -0.029                  | 0.037                     |
| X5 | -0.092                  | -0.161                     | <b>-0.603</b>              | -0.039                  | -0.084                    |

|    | <b>wk24<br/>log TNF</b> | <b>wk24<br/>log sTNFR1</b> | <b>wk24<br/>log sTNFR2</b> | <b>wk24<br/>log IL6</b> | <b>wk24<br/>log sIL6R</b> |
|----|-------------------------|----------------------------|----------------------------|-------------------------|---------------------------|
| X2 | 0.491                   | <b>2.198</b>               | <b>2.411</b>               | 0.447                   | 1.037                     |
| X3 | 0.023                   | 0.017                      | -0.028                     | 0.004                   | -0.009                    |
| X5 | -0.084                  | -0.201                     | -0.084                     | <b>-0.594</b>           | -0.029                    |

## Supplemental References

1. Pierre C. Independent Component Analysis: a new concept? *Signal Processing*. 1994; 36:287-314.
2. Park MY and Hastie T. Penalized logistic regression for detecting gene interactions. *Biostatistics*. 2008;9:30-50.
3. Picard R and Cook D. Cross-validation of regression models. *Journal of the American Statistical Association*. 1984;79:575-583.
4. Kohavi R. A study of cross-validation and bootstrap for accuracy estimation and model selection. *Proceedings of the Fourteenth International Joint Conference on Artificial Intelligence*. 1995;1:1137-1143.
5. Schapire R. The boosting approach to machine learning. In Denison DD, Hansen MH, Holmes C, Mallick B and Yu B (editors), *Non-linear estimation and classification*. Springer, Berlin, 2003.
6. Friedman J, Hastie T and Tibshirani R. Additive logistic regression: a statistical view of boosting. *The Annals of Statistics*. 2000;28:337-407.
